# Supplementary material for: PD 11(1) Schémas de Production en Eau Profonde
Source: Hindawi journal article supplement (doi:10.1155/2020/7406457), 1975-01-01
Supplement: f1 [file 7406457.f1.zip]

| Search number | Query                                                                                                                                                                                                                                                                                                                                                                                                                                                                                                                                                                                                  |
|---------------|--------------------------------------------------------------------------------------------------------------------------------------------------------------------------------------------------------------------------------------------------------------------------------------------------------------------------------------------------------------------------------------------------------------------------------------------------------------------------------------------------------------------------------------------------------------------------------------------------------|
| 5             | ("HFNC" OR "high-flow nasal cannula" OR "high-flow oxygen therapy" OR "nasal high-flow oxygen therapy" OR "Nasal High-flow" OR "nasal high-flow" OR "High-Velocity Nasal Insufflation" OR "high flow oxygen" OR "long-term humidification") AND (("Pulmonary Disease, Chronic Obstructive"[Mesh] OR "COPD" OR "Chronic Obstructive Pulmonary Disease" OR "COAD" OR "Chronic Obstructive Airway Disease" OR "Chronic Obstructive Lung Disease" OR "Chronic Airflow Obstructions" OR "Chronic Airflow Obstruction") OR ("hypercapnia"[MeSH Terms] OR (((hypercapnia) OR hypercarbia) OR CO2 retention))) |
| 4             | ("Pulmonary Disease, Chronic Obstructive"[Mesh] OR "COPD" OR "Chronic Obstructive Pulmonary Disease" OR "COAD" OR "Chronic Obstructive Airway Disease" OR "Chronic Obstructive Lung Disease" OR "Chronic Airflow Obstructions" OR "Chronic Airflow Obstruction") OR ("hypercapnia"[MeSH Terms] OR (((hypercapnia) OR hypercarbia) OR CO2 retention))                                                                                                                                                                                                                                                   |
| 3             | "hypercapnia"[MeSH Terms] OR (((hypercapnia) OR hypercarbia) OR CO2 retention)                                                                                                                                                                                                                                                                                                                                                                                                                                                                                                                         |
| 2             | "Pulmonary Disease, Chronic Obstructive"[Mesh] OR "COPD" OR "Chronic Obstructive Pulmonary Disease" OR "COAD" OR "Chronic Obstructive Airway Disease" OR "Chronic Obstructive Lung Disease" OR "Chronic Airflow Obstructions" OR "Chronic Airflow Obstruction"                                                                                                                                                                                                                                                                                                                                         |
| 1             | "HFNC" OR "high-flow nasal cannula" OR "high-flow oxygen therapy" OR "nasal high-flow oxygen therapy" OR "Nasal High-flow" OR "nasal high-flow" OR "High-Velocity Nasal Insufflation" OR "high flow oxygen" OR "long-term humidification"                                                                                                                                                                                                                                                                                                                                                              |
