# Supplementary material for: PD 11(1) Schémas de Production en Eau Profonde
Source: Hindawi journal article supplement (doi:10.1155/2020/7406457), 1975-01-01
Supplement: f1 [file 7406457.f1.zip]

Search Name: HFNC  
Date Run: 12/09/2020 09:26:10  
Comment: HFNC vs NIV

| ID  | Search Hits                                                                      |
|-----|----------------------------------------------------------------------------------|
| #1  | MeSH descriptor: [Pulmonary Disease, Chronic Obstructive] explode all trees 5683 |
| #2  | (COAD):ti,ab,kw 81                                                               |
| #3  | (COPD):ti,ab,kw 15975                                                            |
| #4  | (Chronic Obstructive Airway Disease):ti,ab,kw 1613                               |
| #5  | (Chronic Airflow Obstructions):ti,ab,kw 2                                        |
| #6  | (Chronic Airflow Obstruction):ti,ab,kw 574                                       |
| #7  | (Chronic Obstructive Pulmonary Disease):ti,ab,kw 13198                           |
| #8  | #1 or #2 or #3 or #4 or #5 or #6 or #7 20083                                     |
| #9  | (hypercarbia):ti,ab,kw 150                                                       |
| #10 | MeSH descriptor: [Hypercapnia] explode all trees 482                             |
| #11 | (CO2 retention):ti,ab,kw 128                                                     |
| #12 | (Hypercapnia):ti,ab,kw 1319                                                      |
| #13 | #10 or #11 or #12 1413                                                           |
| #14 | #8 or #13 21153                                                                  |
| #15 | (high-flow oxygen therapy):ti,ab,kw 715                                          |
| #16 | (HFNC):ti,ab,kw 392                                                              |
| #17 | (high-flow nasal cannula):ti,ab,kw 751                                           |
| #18 | (nasal high-flow oxygen therapy):ti,ab,kw 576                                    |
| #19 | (nasal High-flow):ti,ab,kw 1085                                                  |
| #20 | (High-Velocity Nasal Insufflation):ti,ab,kw 8                                    |
| #21 | #15 or #16 or #17 or #18 or #19 or #20 1252                                      |
| #22 | #14 and #21 220                                                                  |
