# Supplementary material for: PD 11(1) Schémas de Production en Eau Profonde
Source: Hindawi journal article supplement (doi:10.1155/2020/7406457), 1975-01-01
Supplement: f1 [file 7406457.f1.zip]

## Embase Session Results

| No. | Query                                                                                                                                                          | Results |
|-----|----------------------------------------------------------------------------------------------------------------------------------------------------------------|---------|
| #24 | #15 AND #21 AND [humans]/lim AND [clinical study]/lim                                                                                                          | 188     |
| #23 | #15 AND #21 AND [humans]/lim                                                                                                                                   | 305     |
| #22 | #15 AND #21                                                                                                                                                    | 315     |
| #21 | #16 OR #17 OR #18 OR #19 OR #20                                                                                                                                | 2,453   |
| #20 | 'nasal high-flow oxygen therapy':ab,kw,ti                                                                                                                      | 48      |
| #19 | 'high-flow oxygen therapy':ab,kw,ti                                                                                                                            | 347     |
| #18 | 'high flow nasal cannula':ab,kw,ti                                                                                                                             | 1,855   |
| #17 | 'high flow nasal cannula'/exp OR 'high flow nasal cannula oxygen therapy'/exp OR 'high flow nasal cannula therapy'/exp OR 'high flow nasal cannula oxygen'/exp | 552     |
| #16 | 'hfnc':ab,kw,ti                                                                                                                                                | 1,089   |
| #15 | #9 OR #14                                                                                                                                                      | 182,767 |
| #14 | #10 OR #11 OR #12 OR #13                                                                                                                                       | 23,805  |
| #13 | 'co2 retention':kw,ti,ab                                                                                                                                       | 167     |
| #12 | 'hypercapnia':kw,ti,ab                                                                                                                                         | 14,215  |
| #11 | 'hypercapnia':kw,ti,ab                                                                                                                                         | 14,215  |
| #10 | 'hypercapnia'/exp                                                                                                                                              | 20,049  |
| #9  | #1 OR #2 OR #3 OR #4 OR #5 OR #6 OR #7 OR #8                                                                                                                   | 161,973 |
| #8  | 'chronic airflow obstruction':ti,kw,ab                                                                                                                         | 704     |
| #7  | 'chronic airflow obstructions':ti,kw,ab                                                                                                                        | 3       |
| #6  | 'chronic obstructive lung disease':ti,kw,ab                                                                                                                    | 6,168   |
| #5  | 'chronic obstructive airway disease':ti,kw,ab                                                                                                                  | 499     |
| #4  | 'coad':ti,kw,ab                                                                                                                                                | 549     |
| #3  | 'chronic obstructive pulmonary disease':ti,ab,kw                                                                                                               | 72,510  |
| #2  | 'copd':ti,ab,kw                                                                                                                                                | 90,435  |
| #1  | 'chronic obstructive lung disease'/exp OR 'chronic obstructive lung disease'                                                                                   | 137,826 |



© 2020 RELX Intellectual Properties SA. All rights reserved.

Embase, RELX Group and the RE symbol are trade marks of RELX Intellectual Properties SA, used under license.
