# Supplementary material for: High-Flow Nasal Cannula in Hypercapnic Respiratory Failure: A Systematic Review and Meta-Analysis
Source: Can Respir J. 2020 Oct 29;2020:7406457. doi: 10.1155/2020/7406457 (PMC7647788; doi:10.1155/2020/7406457)
Supplement: Supplementary Materials — This section includes Appendix 1 with detailed search terms. [file 7406457.f1.zip]

Archive with 3 entries (3 files):
- 7406457.f1/Search_Strategy_Cochrane.pdf
- 7406457.f1/Search_Strategy_Embase.pdf
- 7406457.f1/Search_Strategy_PubMed.pdf
